# Supplementary material
Source: MDPI journal article supplement (https://www.mdpi.com/2076-3417/10/13/4636)
Supplement: s1 [file s1]

1 Article

2 **Microbiota in waterlogged archaeological wood: use**  
3 **of Next-Generation Sequencing to evaluate the risk**  
4 **of biodegradation**5 Federica Antonelli <sup>1,\*</sup>, Alfonso Esposito <sup>2</sup>, Giulia Galotta <sup>3</sup>, Barbara Davidde Petriaggi <sup>4</sup>, Silvano  
6 Piazza <sup>2</sup>, Manuela Romagnoli <sup>1,\*</sup> and Francesca Guerrieri <sup>5,\*</sup>

7

8

9

## Supplementary materials

10

11

12

Table S1. Raw data obtained for 16S and ITS with the two extraction protocols.

| Sample | 16S reads | ITS reads |
|--------|-----------|-----------|
| 1N1    | 2,702     | 11,200    |
| 1N39   | 44,964    | 61,156    |
| 1N4    | 21,415    | 118,330   |
| 1N88   | 30,056    | 48,538    |
| 1N9    | 43,020    | 112,721   |
| 1PF    | 26,894    | 12,191    |
| 1PL1   | 47,586    | 48,457    |
| 1PL2   | 26,840    | 4,079     |
| 1PO    | 18,570    | 3,170     |
| 1PQ    | 27,112    | 5,613     |
| 2N1    | 36,694    | 69,632    |
| 2N39   | 16,018    | 10,812    |
| 2N88   | 48,885    | 77,865    |
| 2N9    | 53,661    | 24,623    |
| 2PF    | 10,708    | 39,232    |
| 2PO    | 55,023    | 204       |
| 2PQ    | 34,399    | 109,015   |

13

14

15

16

17

18

19

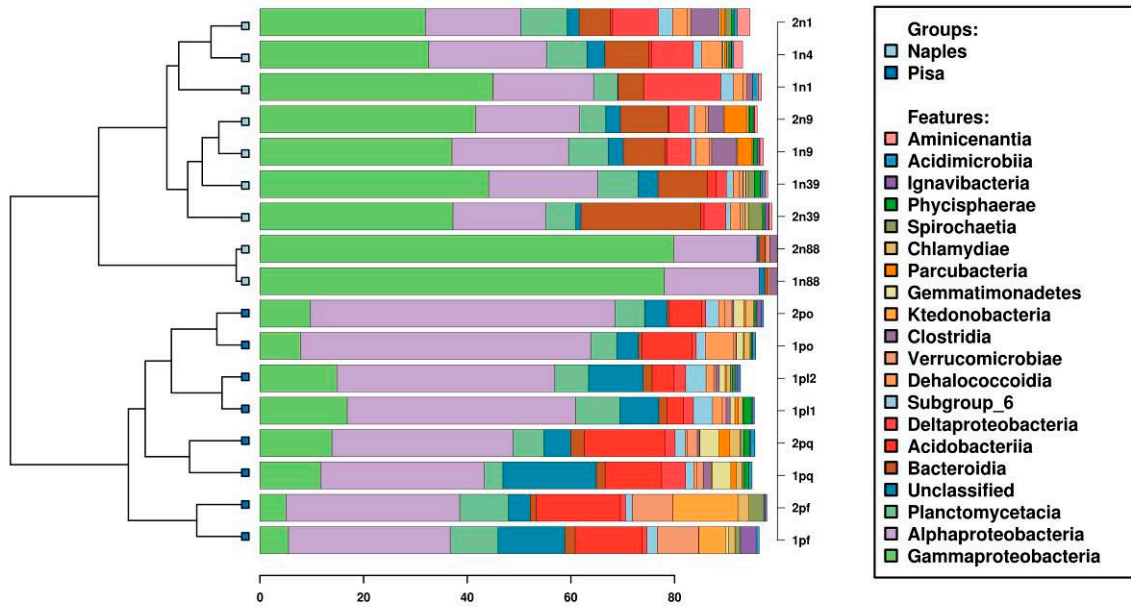

20  
21

Figure S1. 16S. Stacked barcharts of the taxonomic profile at class level.

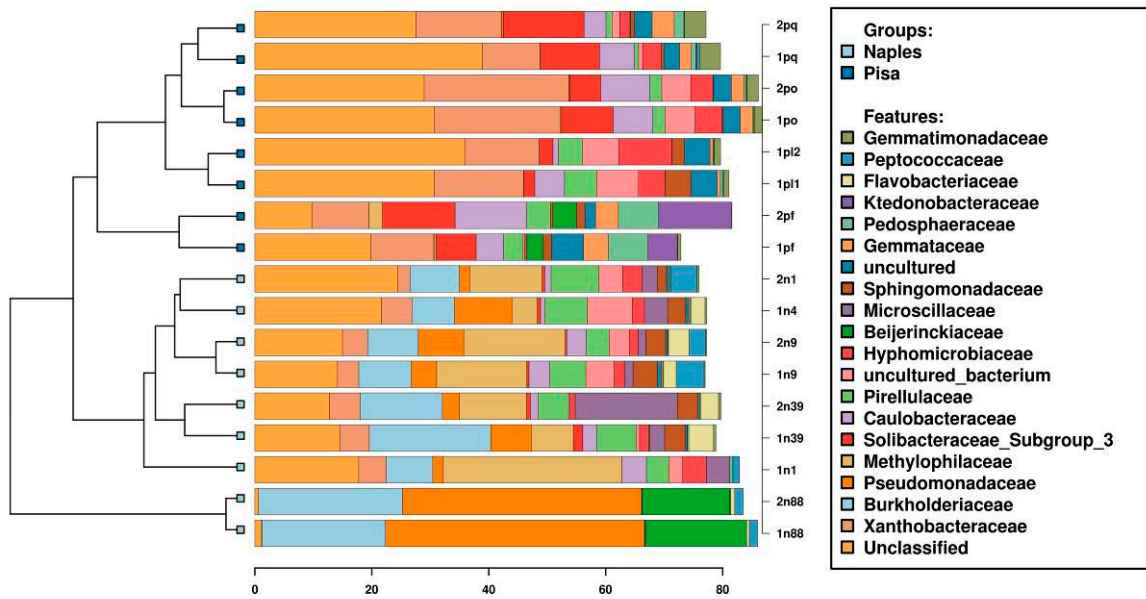

22  
23

Figure S2. 16S. Stacked barcharts of the taxonomic profile at family level.

24

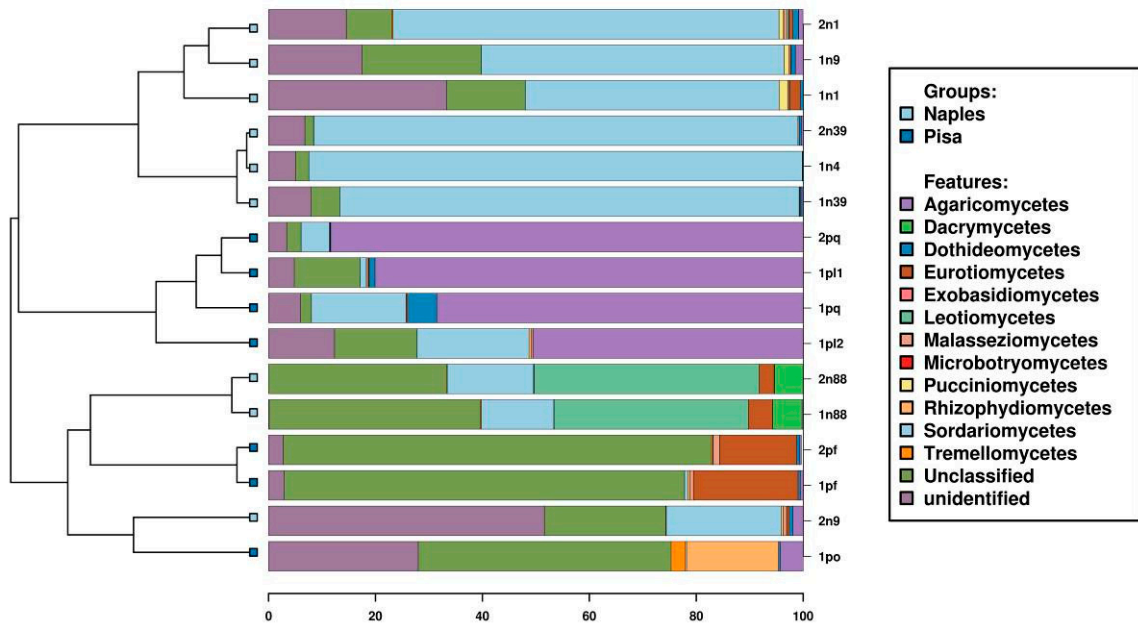

Figure S3. ITS2. Stacked barcharts of the taxonomic profile at class level.

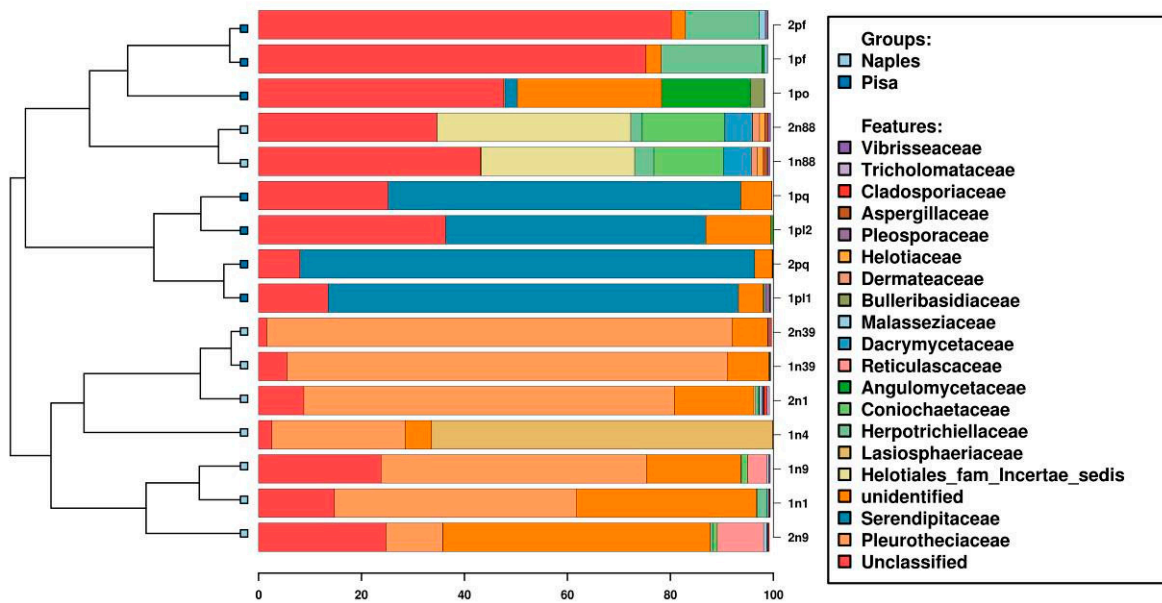

Figure S4. ITS2. Stacked barcharts of the taxonomic profile at family level.

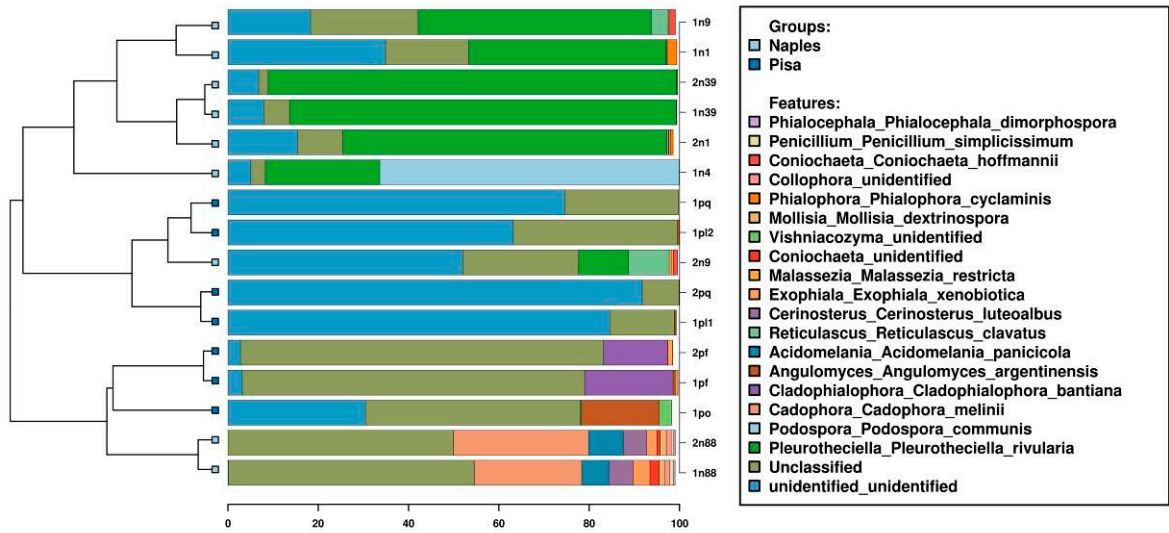

29  
30

Figure S5. ITS2. Stacked bar charts of the taxonomic profile at species level.

31

32

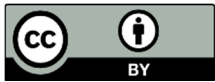

© 2020 by the authors. Submitted for possible open access publication under the terms and conditions of the Creative Commons Attribution (CC BY) license (<http://creativecommons.org/licenses/by/4.0/>).

33
